# Supplementary material
Source: PubMed Central journal article supplement (PMC3406934)
Supplement: NIHMS358769-supplement-Supplemental_material.pdf [file NIHMS358769-supplement-Supplemental_material.pdf]

| Gene ID  | GeneID with exon and segment | Chromosome | Strand | Exon | Section | Primer 5             | Primer 3              | Nucleic Acids | Amino Acids | seroreactive |
|----------|------------------------------|------------|--------|------|---------|----------------------|-----------------------|---------------|-------------|--------------|
| PFA0110w | PFA0110we2s2                 | chr1       | +      | 2    | 2       | AACGAAGCCTACCAAGTTTT | TTCATCATATTCTTCATTGT  | 1557          | 518         | yes          |
| PFA0125c | PFA0125ce1s2                 | chr1       | -      | 1    | 2       | AACAAAGAAATGTTATCTAT | ACTTGTAATCTTTGTTTTTC  | 2256          | 752         | yes          |
| PFA0410w | PFA0410we1s3                 | chr1       | +      | 1    | 3       | ATAATGAATTTTGGAGATGT | TATCTTTTTGTCGTTGGTCT  | 2256          | 751         | yes          |
| PFA0430c | PFA0430ce1s2                 | chr1       | -      | 1    | 2       | TTGATAATCCTAATTTTGTA | CAATTTGTTCTCCACGCTTT  | 1626          | 542         | yes          |
| PFA0510w | PFA0510we1s2                 | chr1       | +      | 1    | 2       | GATATAAAAGAGAAATTAAT | TGTTGAATGTTTTTGTTCGT  | 2292          | 764         | yes          |
| PFA0510w | PFA0510we1s3                 | chr1       | +      | 1    | 3       | AAATTTAATTTAAAGATGA  | CTTTATATATATCCTTATTT  | 2289          | 763         | yes          |
| PFA0725w | PFA0725we1s1                 | chr1       | +      | 1    | 1       | ATGGCTGTTAAATAAGTAC  | ATCAAAGGTTAAACCTGGAG  | 795           | 265         | yes          |
| PFB0115w | PFB0115we1s1                 | chr2       | +      | 1    | 1       | ATGTTAAAGAAATATATTAT | TGCGTCTGTTTCTTCTACTT  | 1818          | 606         | yes          |
| PFB0150c | PFB0150ce1s1                 | chr2       | -      | 1    | 1       | ATGAAGACGACAAAAGAAAA | GAGAAAAAATAACTGCTTTC  | 1518          | 506         | yes          |
| PFB0300c | PFB0300ce1s1                 | chr2       | -      | 1    | 1       | ATGAAGGTAATTTAAACATT | TATGAATATGGCAAAAGATA  | 819           | 272         | yes          |
| PFB0305c | PFB0305ce1s1                 | chr2       | -      | 1    | 1       | ATGAATATATTATGATTCT  | GTCAAAATGTAATCTATTTG  | 516           | 172         | yes          |
| PFB0310c | PFB0310ce1s1                 | chr2       | -      | 1    | 1       | ATGTGGATAGTTAAATTTTT | ACCTGAATTTGATGAACCTTG | 486           | 162         | yes          |
| PFB0340c | PFB0340ce2s1                 | chr2       | -      | 2    | 1       | TGTGTTATATTTAACAAAAA | ATTTTCAGTAGTATCTTTTG  | 834           | 278         | yes          |
| PFB0915w | PFB0915we2s1                 | chr2       | +      | 2    | 1       | TCTGATATAACAAGAGTTG  | ATTATCTAAAATCGAACTAA  | 2268          | 756         | yes          |
| PFB0915w | PFB0915we2s2                 | chr2       | +      | 2    | 2       | TCAGAAGAAAAGGTTGATTT | TTTTGATTTTTGCGTCTAC   | 2265          | 754         | yes          |
| PFC0130c | PFC0130ce1s1                 | chr3       | -      | 1    | 1       | ATGTCTATAAGAAATAGAGA | GAATCTACCATTTTTTACAT  | 1260          | 419         | yes          |
| PFC0210c | PFC0210ce1s1                 | chr3       | -      | 1    | 1       | ATGATGAGAAAATTAGCTAT | ATTAAGGAACAAGAAGGATA  | 1194          | 397         | yes          |
| PFC0425w | PFC0425we1s3                 | chr3       | +      | 1    | 3       | ATTTTAAACAACCTGGGTCT | GTGATATAAATCCTTAAAAA  | 2775          | 925         | yes          |
| PFC0440c | PFC0440ce1s3                 | chr3       | -      | 1    | 3       | CTTACTCAAGAAGGACATGA | CACTTGTGCGATTTGTTCTCC | 2304          | 767         | yes          |
| PFC0805w | PFC0805we1s2                 | chr3       | +      | 1    | 2       | TATGTTGGTTTTACTGTGAG | ATTTTTTACCTGGACTTAA   | 2496          | 832         | yes          |
| PFC0810c | PFC0810ce3s1                 | chr3       | -      | 3    | 1       | AAATTAGATAAGGAGAAGAA | ACAATTTTCATTTTTTAAAC  | 2844          | 947         | yes          |
| PFD0310w | PFD0310we1s1                 | chr4       | +      | 1    | 1       | ATGAATATTCGAAAGTTCAT | AGAATCATCTCCTTCGTCTC  | 474           | 157         | yes          |
| PFD0380c | PFD0380ce2s2                 | chr4       | -      | 2    | 2       | TATTTTTCAAATGTTATAGA | CTTTAAAAAGGTAGGGTTA   | 2220          | 740         | yes          |
| PFD0385w | PFD0385we1s2                 | chr4       | +      | 1    | 2       | ATAAGTAATCACAAGAGTAT | TTTTGAACTTTTTTTTTTTG  | 2967          | 988         | yes          |
| PFD0430c | PFD0430ce3s1                 | chr4       | -      | 3    | 1       | AATGATAAAAAAATAAAACA | CGATTCAACTCTACTACAAG  | 441           | 147         | yes          |
| PFD0995c | PFD0995ce2s1                 | chr4       | -      | 2    | 1       | AAAAAATCCAATCTACTAT  | TATATTCCATATATCCGATA  | 1305          | 434         | yes          |
| PFE0040c | PFE0040ce2s1                 | chr5       | -      | 2    | 1       | GATATCTATACGAATTGTGA | TTCTTGTTTTTCAATTTCTT  | 2106          | 702         | yes          |
| PFE0060w | PFE0060we2s1                 | chr5       | +      | 2    | 1       | AGGTCATATCCCAATCTGG  | AGTTAGTAATAAATTATGAA  | 1158          | 385         | yes          |
| PFE0090w | PFE0090we1s2                 | chr5       | +      | 1    | 2       | GAACAAGAAGAAGAAGAGGA | TTTCTTAGTATTTTGCAGATA | 1641          | 546         | yes          |
| PFE0465c | PFE0465ce1s1                 | chr5       | -      | 1    | 1       | ATGTACGATATAAATAAGTC | AGATATCAAAGAGTTCAATG  | 2880          | 960         | yes          |
| PFE0565w | PFE0565we1s1                 | chr5       | +      | 1    | 1       | ATGAACATGATTAATATTGG | CATAAATTCCTCTTGAATTT  | 1146          | 381         | yes          |
| PFE0570w | PFE0570we1s3                 | chr5       | +      | 1    | 3       | AGTGAAAGAATAAAATATTT | TTCATTAATAATCGGTAGCTT | 2796          | 932         | yes          |
| PFE0830c | PFE0830ce1s2                 | chr5       | -      | 1    | 2       | AGAGATGATAATGTGGTTAC | ATTTTCGTACGCTTCGATTA  | 2442          | 813         | yes          |
| PFE1085w | PFE1085we1s1                 | chr5       | +      | 1    | 1       | ATGTCGGCTTTTGAAGAGTT | TATTTGAAAGTTCAACAATT  | 2526          | 841         | yes          |
| PFE1590w | PFE1590we1s1                 | chr5       | +      | 1    | 1       | ATGAGATTCTCCAAAGTATT | TTGTTCTTTTTGGGTTCTT   | 546           | 181         | yes          |
| PFE1600w | PFE1600we2s1                 | chr5       | +      | 2    | 1       | AATGTACTTGTTTCTAATAA | TTGATTGTTAGAGACTTCAT  | 1329          | 442         | yes          |

|            |                |      |   |    |   |                       |                       |      |     |     |
|------------|----------------|------|---|----|---|-----------------------|-----------------------|------|-----|-----|
| MAL6P1.237 | MAL6P1.237e6s2 | chr6 | - | 6  | 2 | AAAAATTTCTCTTTATTGTA  | CTTTTCCACTAATGATAATA  | 1932 | 644 | yes |
| MAL6P1.252 | MAL6P1.252e1s3 | chr6 | - | 1  | 3 | GGAGACTATAGAGATATATG  | CTTTAGAAAAAGTAAGTGA   | 2079 | 693 | yes |
| MAL7P1.146 | MAL7P1.146e5s1 | chr7 | - | 5  | 1 | AATATCTTGTATAAATTGTT  | ATTATTATCTTTTTTGATT   | 1566 | 522 | yes |
| MAL7P1.77  | MAL7P1.77e1s1  | chr7 | + | 1  | 1 | ATGAAGGTGTGGGGAGCTTG  | CTTTAACAAATCTTTTCGATA | 1434 | 478 | yes |
| MAL7P1.92  | MAL7P1.92e5s1  | chr7 | - | 5  | 1 | TATAACAATCATATAATTGT  | ACCATTAACAAGAATAGTAG  | 693  | 231 | yes |
| PF07_0006  | PF07_0006e2s1  | chr7 | + | 2  | 1 | AATTTAAAATGTAATTTTTA  | ATTAATTAACATATATAAAG  | 1713 | 570 | yes |
| PF07_0007  | PF07_0007e1s1  | chr7 | + | 1  | 1 | ATGAGTCAACCACAAAAACA  | GTAATCATATATTTGTAAGG  | 288  | 96  | yes |
| PF07_0016  | PF07_0016e1s1  | chr7 | + | 1  | 1 | ATGGAGAAGAATACGTACGA  | GTCATAGATATATTTTCCA   | 2820 | 940 | yes |
| PF07_0048  | PF07_0048e1s2  | chr7 | - | 1  | 2 | AAGGACACCACAGAAGACAC  | CTTTAGAAAAAATAAGTGA   | 2652 | 884 | yes |
| PF07_0048  | PF07_0048e2s1  | chr7 | - | 2  | 1 | AAAAAAACCAAAGCATCTGT  | TATATTCCATATATCCGCTA  | 1395 | 464 | yes |
| PF07_0053  | PF07_0053e1s4  | chr7 | - | 1  | 4 | AACATGGATATGAATAATGT  | AATTTGACTATATTGTAAC   | 2709 | 902 | yes |
| PF07_0126  | PF07_0126e1s2  | chr7 | + | 1  | 2 | AATAATAATAAGGACAATAA  | TTCCACTTTTTCGCTAGCTG  | 2022 | 673 | yes |
| MAL8P1.156 | MAL8P1.156e1s2 | chr8 | + | 1  | 2 | GTGGAAGAAGTATTATCCAT  | TGAAGTGCACAATATATCA   | 1542 | 513 | yes |
| MAL8P1.23  | MAL8P1.23e1s1  | chr8 | + | 1  | 1 | ATGAAAATACCTATACCTAA  | TAATAATATTTTATATAACT  | 2913 | 971 | yes |
| MAL8P1.23  | MAL8P1.23e1s9  | chr8 | + | 1  | 9 | AATATATCTAATGAAAATGA  | TATGAAACCGAATCCTTCTT  | 2904 | 967 | yes |
| PF08_0034  | PF08_0034e1s2  | chr8 | - | 1  | 2 | TTTGGTCAGCATATTCAGGG  | CTGTAACTTATCGCTCTGCT  | 1680 | 560 | yes |
| PF08_0035  | PF08_0035e1s1  | chr8 | + | 1  | 1 | ATGGAAGTTTTACAAAACAT  | TGGGACATTAATAATTCAATT | 1794 | 598 | yes |
| PF08_0089  | PF08_0089e1s1  | chr8 | - | 1  | 1 | ATGCTTGATGTGTTTAGAGA  | TATGTATGAAAAATAAATAC  | 2691 | 897 | yes |
| PF08_0107  | PF08_0107e1s2  | chr8 | - | 1  | 2 | TGTGAAATAGTACAAAACCT  | CTTTAGAAAAAATAAGTGA   | 2715 | 905 | yes |
| PF08_0107  | PF08_0107e2s1  | chr8 | - | 2  | 1 | AAAAAAACCAAATCATCTGT  | TATATCCCACACATCTCCTA  | 1416 | 471 | yes |
| PF08_0108  | PF08_0108e1s1  | chr8 | + | 1  | 1 | ATGAAACGCATTAGCCCTCT  | GTTTTACTTTTTGCTCTTG   | 1722 | 573 | yes |
| PF08_0121  | PF08_0121e1s1  | chr8 | - | 1  | 1 | ATGAAAAATTTGAATCAGAA  | TAATTCTCCGCATTCTACTA  | 654  | 217 | yes |
| PF08_0127  | PF08_0127e1s2  | chr8 | + | 1  | 2 | TTAAAAAAATTATAGAAAA   | CAATTTTGATTTTTGGTTTT  | 1893 | 630 | yes |
| PF08_0137  | PF08_0137e2s1  | chr8 | + | 2  | 1 | AATGTTGAAATATTAAGAA   | GTCATCAAAGTTTCTTCTGT  | 1761 | 587 | yes |
| PF08_0137  | PF08_0137e2s2  | chr8 | + | 2  | 2 | AGAAACTTTGATGAAAGAAA  | TGCTCCACTATATTTTCTCA  | 1755 | 584 | yes |
| PF08_0140  | PF08_0140e2s1  | chr8 | - | 2  | 1 | AAAAAAACCAAATCTACTAT  | TATATCCCACACATCTCCTA  | 1308 | 435 | yes |
| PF08_0141  | PF08_0141e1s2  | chr8 | + | 1  | 2 | GACGTATGTGGTATAACGGA  | CTCTTTTCTTATATCATATG  | 2505 | 835 | yes |
| PF08_0141  | PF08_0141e2s1  | chr8 | + | 2  | 1 | AAAAAACCGAAATCACCTGT  | TATATTCCATACATCCGATA  | 1179 | 392 | yes |
| PFI0170w   | PFI0170we1s1   | chr9 | + | 1  | 1 | ATGTTTTTTAACGATGGGGA  | TTTGGAAACACTTTCATCCT  | 2106 | 702 | yes |
| PFI0265c   | PFI0265ce7s1   | chr9 | - | 7  | 1 | GTTTTTACC GCCTTATACAA | CAATTCATTTTCAGAAGTAA  | 669  | 222 | yes |
| PFI0315c   | PFI0315ce1s1   | chr9 | - | 1  | 1 | ATGAAGAAAGATAATAAGAA  | TGAATTTATATTTCTTTTTT  | 2514 | 837 | yes |
| PFI0345w   | PFI0345we1s1   | chr9 | + | 1  | 1 | ATGAGTGAATTGAAACCATT  | TATAAATTTATATTGACTAT  | 1731 | 577 | yes |
| PFI0355c   | PFI0355ce1s1   | chr9 | - | 1  | 1 | ATGAAAAACCTTGACGCAAA  | TATGATATATTTTTTAAGT   | 2769 | 922 | yes |
| PFI0370c   | PFI0370ce1s1   | chr9 | - | 1  | 1 | ATGGAAGCTTATTTAAATAA  | AAATGTCATTCTATGATGTG  | 840  | 279 | yes |
| PFI0410c   | PFI0410ce17s1  | chr9 | - | 17 | 1 | TGGTATAATAAGGGTTCAA   | CTCTTCCGCCTCCATAGCAT  | 654  | 218 | yes |
| PFI0460w   | PFI0460we1s1   | chr9 | + | 1  | 1 | ATGGAAGTTATAACAGAAAA  | GTACCACTTTTTGTTTCTC   | 1470 | 489 | yes |
| PFI0510c   | PFI0510ce1s2   | chr9 | - | 1  | 2 | ATTTTTATAAAGAAGTATAT  | GGTGGTCATATGATTTATAT  | 2571 | 856 | yes |
| PFI0630w   | PFI0630we2s1   | chr9 | + | 2  | 1 | GGAGCTTTTGAGGCTGAAGA  | ATTTTTCTGTCTTTTTTG    | 498  | 165 | yes |
| PFI1475w   | PFI1475we1s1   | chr9 | + | 1  | 1 | ATGAAGATCATATTTCTTTTT | ATTGTTTACTACTATCATATA | 2610 | 870 | yes |

|           |               |       |   |   |   |                      |                        |      |     |     |
|-----------|---------------|-------|---|---|---|----------------------|------------------------|------|-----|-----|
| PF11475w  | PF11475we1s2  | chr9  | + | 1 | 2 | AATATTCAAATAACATACC  | AATGAAACTGTATAATATTA   | 2607 | 868 | yes |
| PF11500w  | PF11500we2s2  | chr9  | + | 2 | 2 | ATGTATGGTAAGACAATATG | ATTTATGAAGATATCTCTAT   | 2745 | 915 | yes |
| PF11520w  | PF11520we1s1  | chr9  | + | 1 | 1 | ATGCTTTCCATAGCAAGTAC | TTCATTTTTGTTTATTTCT    | 918  | 305 | yes |
| PF11735c  | PF11735ce2s1  | chr9  | - | 2 | 1 | TTATTAATCTATAAAGGA   | ATTAAATACAGAACCTTCTA   | 1953 | 650 | yes |
| PF10_0075 | PF10_0075e1s2 | chr10 | - | 1 | 2 | ATTGGAAAAATTTCCAGAT  | TAAATGTTCTGTTTGAATTT   | 2421 | 806 | yes |
| PF10_0079 | PF10_0079e1s1 | chr10 | + | 1 | 1 | ATGATGGAAAGAGGAAGATC | ATTCATCATTGCTCTTTTTA   | 2934 | 978 | yes |
| PF10_0115 | PF10_0115e1s2 | chr10 | + | 1 | 2 | GATATGTTATATTATTGTGG | ATTTTCATTTGATTGTTTTT   | 1734 | 577 | yes |
| PF10_0138 | PF10_0138e1s1 | chr10 | + | 1 | 1 | ATGAATCGAATATTTTATTT | AAGGTGTTCCATAAAAAATTGT | 2214 | 738 | yes |
| PF10_0138 | PF10_0138e1s2 | chr10 | + | 1 | 2 | TATTTCCCAACCAAAGATAT | TGGATTTCTAAAATCTAGTG   | 2208 | 735 | yes |
| PF10_0143 | PF10_0143e1s3 | chr10 | - | 1 | 3 | GCCGAATTGTTATTAGCAGA | TAATTTTAAGGATTTTTTGG   | 2613 | 870 | yes |
| PF10_0177 | PF10_0177e1s1 | chr10 | - | 1 | 1 | ATGGATGTACAAAAA      | TGATTGTATGTCCAGTATTA   | 2997 | 999 | yes |
| PF10_0214 | PF10_0214e3s1 | chr10 | + | 3 | 1 | GGCGCAAATTTATTTTATA  | CATATATTTATTGACATTAT   | 2742 | 913 | yes |
| PF10_0224 | PF10_0224e1s3 | chr10 | - | 1 | 3 | GAGGAAAGTAAATGTTTTT  | CATAATTGATGATAAAGCAC   | 2892 | 964 | yes |
| PF10_0242 | PF10_0242e2s2 | chr10 | + | 2 | 2 | TTATATTCAAATGGAAAACA | AGAACTTAACCATGGAGCTG   | 2334 | 777 | yes |
| PF10_0251 | PF10_0251e2s3 | chr10 | - | 2 | 3 | TTGGATGTTAGTCTTATTAA | GTGTTTTTTAGATACAGAT    | 2070 | 690 | yes |
| PF10_0323 | PF10_0323e1s1 | chr10 | + | 1 | 1 | ATGAAAGTTGGTAAAATATT | TTCTTTCTGACTCTTGGTG    | 1068 | 355 | yes |
| PF10_0343 | PF10_0343e1s1 | chr10 | + | 1 | 1 | ATGAATAGAATCTTGTCTGT | CATTCCAATTAACATATTA    | 1758 | 585 | yes |
| PF10_0348 | PF10_0348e1s1 | chr10 | + | 1 | 1 | ATGAAGAAAATATATAGTAT | TTTTTGAAATAAATCTGTCA   | 2094 | 697 | yes |
| PF10_0356 | PF10_0356e2s1 | chr10 | + | 2 | 1 | AAAGACTTGCTGAGACTTGC | GCTTTGTTGCCCTGTA       | 1578 | 526 | yes |
| PF10_0356 | PF10_0356e2s2 | chr10 | + | 2 | 2 | AGCGATCTAGAACAAGAGAA | TAGTTTCATAAAATATTTAG   | 1572 | 523 | yes |
| PF10_0374 | PF10_0374e6s2 | chr10 | + | 6 | 2 | CCTGAAGAACTAGTAGAAGA | CTTAGTCTCTGGTACCAC     | 2343 | 781 | yes |
| PF11_0008 | PF11_0008e1s1 | chr11 | - | 1 | 1 | ATGGGGTCACAAACATCAA  | TTTAAAGTGTTTTCAACTA    | 2610 | 870 | yes |
| PF11_0008 | PF11_0008e1s2 | chr11 | - | 1 | 2 | GCAACAACACCCGGGGTGAA | ACCTGTAGTTTTGTTGGGTG   | 2610 | 870 | yes |
| PF11_0008 | PF11_0008e2s1 | chr11 | - | 2 | 1 | AAAAAATCCAAATCTTCTGT | TATATTCATACATCCGATA    | 1269 | 422 | yes |
| PF11_0037 | PF11_0037e2s1 | chr11 | - | 2 | 1 | AATGTACCTAGTATTGAAGA | ACCTATATAAGGAGCTTCTG   | 1713 | 570 | yes |
| PF11_0226 | PF11_0226e1s1 | chr11 | - | 1 | 1 | ATGAAACATACAAAATAAC  | TAATTCATTAATTTCAATT    | 2064 | 688 | yes |
| PF11_0232 | PF11_0232e1s1 | chr11 | + | 1 | 1 | ATGGAGAATAATAAAGATAA | GACTCGAGTAAATACTTTTG   | 2043 | 681 | yes |
| PF11_0240 | PF11_0240e2s3 | chr11 | + | 2 | 3 | AAAATATTAATACAAA     | TTCATTAGCTTCTTCTAAAC   | 2619 | 873 | yes |
| PF11_0294 | PF11_0294e1s1 | chr11 | - | 1 | 1 | ATGGATATCGAGAATTCAA  | GTGAAATTGTTGGGAACATA   | 1881 | 627 | yes |
| PF11_0344 | PF11_0344e1s1 | chr11 | + | 1 | 1 | ATGAGAAAATTATACTGCGT | ATAGTATGGTTTTTCCATCA   | 1869 | 622 | yes |
| PF11_0351 | PF11_0351e1s1 | chr11 | + | 1 | 1 | ATGGCATCACTCAATAAAAA | TGCATTATCTTTATTTCTT    | 1992 | 663 | yes |
| PF11_0404 | PF11_0404e2s3 | chr11 | - | 2 | 3 | AAAAGTAATGAGAACTTGA  | CTGTTTATTTTCATGTCCTA   | 2187 | 729 | yes |
| PF11_0418 | PF11_0418e1s2 | chr11 | - | 1 | 2 | TTACAGAATGGTAATGACCA | ACTTAAAATATTACGAGATT   | 2313 | 771 | yes |
| PF11_0479 | PF11_0479e3s1 | chr11 | - | 3 | 1 | GGTATTCACAGTGGCATGAC | ATTATTTGAGTTGGTAATCT   | 2814 | 938 | yes |
| PF11_0507 | PF11_0507e1s1 | chr11 | + | 1 | 1 | ATGAAAGAACTAGAAAGTGA | TTTAACTGAATCTTCTCAT    | 2802 | 934 | yes |
| PF11_0507 | PF11_0507e1s4 | chr11 | + | 1 | 4 | GTTACTGAAGAAATAGTAGA | TTCAGGAACTAATTGTTCTT   | 2802 | 934 | yes |
| PF11_0507 | PF11_0507e1s6 | chr11 | + | 1 | 6 | TCTACTGAAGGTTTAGAAGA | GTTCTCATTTACACTAAATT   | 2784 | 927 | yes |
| PF11_0509 | PF11_0509e2s1 | chr11 | + | 2 | 1 | GGAAATTTTGGATATAATGG | CTTCATATCTGCATTA       | 1569 | 523 | yes |
| PFL0275w  | PFL0275we1s2  | chr12 | + | 1 | 2 | ACATTTCTTAAGATAAAACC | ATTATTCATTTGATGGACT    | 2703 | 900 | yes |

|             |                 |       |   |   |   |                       |                      |      |      |     |
|-------------|-----------------|-------|---|---|---|-----------------------|----------------------|------|------|-----|
| PFL0440c    | PFL0440ce1s1    | chr12 | - | 1 | 1 | ATGATAAAGAAAAGAAAAA   | AAAATTACCTTTTCTATTT  | 1800 | 600  | yes |
| PFL0470w    | PFL0470we1s1    | chr12 | + | 1 | 1 | ATGGTACTTGAATTAGTTGT  | TCCCTTTGTATATTTCCATA | 2379 | 792  | yes |
| PFL0590c    | PFL0590ce1s1    | chr12 | - | 1 | 1 | ATGAGTTCTCAAAATAATAA  | TTGTTCAGATTTCTCTTCTA | 2394 | 798  | yes |
| PFL0795c    | PFL0795ce1s1    | chr12 | - | 1 | 1 | ATGAAGTATCCCAACTTTTT  | ATCACTATCACTGTGTGTTT | 666  | 221  | yes |
| PFL1070c    | PFL1070ce1s1    | chr12 | - | 1 | 1 | ATGAAATTAATAACATATA   | TAATTCGTCACCTTTATCAT | 2466 | 821  | yes |
| PFL1085w    | PFL1085we1s2    | chr12 | + | 1 | 2 | GCAAATAAATTTAAAAATTT  | ACATTTGTTTTCATCATCAT | 2472 | 824  | yes |
| PFL1385c    | PFL1385ce1s1    | chr12 | - | 1 | 1 | ATGATGAACATGAAAATTGT  | TTTTGATTCTTCAGTTGTCA | 2232 | 743  | yes |
| PFL1745c    | PFL1745ce2s1    | chr12 | - | 2 | 1 | ATGAATAACGAAATCGTAAA  | CGAATTTGTATTTCCACAG  | 1338 | 445  | yes |
| PFL1925w    | PFL1925we1s1    | chr12 | + | 1 | 1 | ATGAGTTCGAAGTATGACAA  | GTCGCTTTTAAATATGTCAA | 2643 | 880  | yes |
| PFL1930w    | PFL1930we1s5    | chr12 | + | 1 | 5 | ACTCTTGAATATTTAGAAGA  | TATATCCTTTTCTGCACATT | 2931 | 977  | yes |
| PFL2120w    | PFL2120we1s2    | chr12 | + | 1 | 2 | AATATTATACTTTTCTTACT  | ACCTTTCCTCTTTTCTATTT | 1716 | 572  | yes |
| PFL2390c    | PFL2390ce1s3    | chr12 | - | 1 | 3 | AAATTTTATGTAAACATCC   | TCTGTTTTTCTCCATCATTG | 2751 | 917  | yes |
| PFL2505c    | PFL2505ce8s2    | chr12 | - | 8 | 2 | AATTTCAATAAAAAAAAAA   | TGGTATGTAAATTTCCCTCT | 2124 | 707  | yes |
| PFL2610w    | PFL2610we2s1    | chr12 | + | 2 | 1 | GAGAATTATCTAAATAACCA  | CTTACATAAATGTTTCTTGC | 819  | 272  | yes |
| MAL13P1.176 | MAL13P1.176e1s1 | chr13 | - | 1 | 1 | ATGGAAATTAACAATAGT    | TCTTCTTCTCTTGTITTT   | 1704 | 568  | yes |
| MAL13P1.176 | MAL13P1.176e1s2 | chr13 | - | 1 | 2 | GAAGAAAGAAAAGAGAGAGA  | AAAATATTTTCTTCATTTT  | 1698 | 565  | yes |
| MAL13P1.234 | MAL13P1.234e1s3 | chr13 | + | 1 | 3 | GATAAGAGGAATTATAATAT  | GTTGTTATTTTTATTGTTAT | 3039 | 1013 | yes |
| MAL13P1.323 | MAL13P1.323e1s1 | chr13 | + | 1 | 1 | ATGGATTTTGCATACAAACA  | ATTATAACTATTTGTAACAT | 2493 | 831  | yes |
| PF13_0003   | PF13_0003e1s1   | chr13 | - | 1 | 1 | ATGGGGAATACACAATCATC  | TGAACGATTGGCTTCCACC  | 2985 | 995  | yes |
| PF13_0003   | PF13_0003e2s1   | chr13 | - | 2 | 1 | AAAAAACCGAAATCACCTGT  | TATATCCATACATCCGATA  | 1197 | 398  | yes |
| PF13_0153   | PF13_0153e1s2   | chr13 | + | 1 | 2 | GAAGGATCAAGAAATCAGCG  | ATGAAATATATTATCAACC  | 1533 | 510  | yes |
| PF13_0190   | PF13_0190e1s1   | chr13 | + | 1 | 1 | ATGGTCGACGATAAGAATAA  | CATTTTATTATACTTGTGCG | 1575 | 524  | yes |
| PF13_0197   | PF13_0197e1s1   | chr13 | - | 1 | 1 | ATGAAGAGTAATATCATATT  | CATTGTGTTTAGTAAATTA  | 1056 | 351  | yes |
| PF13_0210   | PF13_0210e1s1   | chr13 | - | 1 | 1 | ATGAAACCAAATGATAATTT  | TATGTTATTATTTTATTTA  | 2484 | 828  | yes |
| PF13_0210   | PF13_0210e1s3   | chr13 | - | 1 | 3 | ATGGTTAATTATAAAAATGA  | ATCTTTTTCTTTACATTTTT | 2484 | 828  | yes |
| PF13_0262   | PF13_0262e2s1   | chr13 | - | 2 | 1 | AAAGATAAGAAAAAGAGGA   | ATTTGCTGGTCGCATAGTGG | 1551 | 516  | yes |
| PF13_0275   | PF13_0275e2s1   | chr13 | - | 2 | 1 | GGAAACGTTAGTACTAATGT  | AGCTTCAACTACTTCTTCCT | 660  | 219  | yes |
| PF13_0278   | PF13_0278e1s2   | chr13 | + | 1 | 2 | AATGATTATAATAATAATAA  | ATTACTTAATACAGGATCTG | 1773 | 590  | yes |
| PF14_0096   | PF14_0096e1s1   | chr14 | + | 1 | 1 | ATGAGTTATTTGAGCAACAT  | TGCGTTTGTGTATTTCCA   | 1545 | 514  | yes |
| PF14_0102   | PF14_0102e1s1   | chr14 | + | 1 | 1 | ATGAGTTTCTATTTGGGTAG  | ATCTAATCTCTTGAAGGCAA | 2349 | 782  | yes |
| PF14_0170   | PF14_0170e1s5   | chr14 | + | 1 | 5 | ACAAATGTCGAAATGGATAA  | TTTTGTATTTTTATAAGTT  | 2700 | 900  | yes |
| PF14_0198   | PF14_0198e1s1   | chr14 | + | 1 | 1 | ATGTTTTTTTTTGAAGAATAA | GGAATCCAAAACCTGCTGTG | 2640 | 879  | yes |
| PF14_0315   | PF14_0315e2s5   | chr14 | - | 2 | 5 | GAGGATAAGGATATAATTAT  | AATATCACCATCATTGTCAT | 3003 | 1000 | yes |
| PF14_0326   | PF14_0326e2s4   | chr14 | - | 2 | 4 | ATATATATACTTAAGCATTT  | AAAATTATAACTATCGTCAT | 2787 | 929  | yes |
| PF14_0327   | PF14_0327e1s1   | chr14 | + | 1 | 1 | ATGAATAAGAACACAATAA   | AAAGTCGGGACCACGAGATA | 1887 | 628  | yes |
| PF14_0344   | PF14_0344e1s1   | chr14 | + | 1 | 1 | ATGAGAATAATAATATTAGC  | ATTGTCGTCCTCTTCTCGT  | 2982 | 993  | yes |
| PF14_0377   | PF14_0377e1s1   | chr14 | + | 1 | 1 | ATGAAACTTTTAAAGTAAC   | ACCATCTGCTAAATTTGGGT | 501  | 167  | yes |
| PF14_0419   | PF14_0419e9s2   | chr14 | - | 9 | 2 | GAAATGTTTATACTAAATAA  | AGTAGATAATATATCATCCA | 2340 | 780  | yes |
| PF14_0463   | PF14_0463e1s3   | chr14 | - | 1 | 3 | ATGAATAATTATACTCCTGC  | ACTTTCCTCATCATCTATAT | 2763 | 921  | yes |

|           |               |       |   |   |   |                      |                       |      |      |     |
|-----------|---------------|-------|---|---|---|----------------------|-----------------------|------|------|-----|
| PF14_0495 | PF14_0495e1s1 | chr14 | + | 1 | 1 | ATGTTAAATTTTTTCATATT | ATCATAGTCACTATCACTAT  | 2229 | 743  | yes |
| PF14_0588 | PF14_0588e1s1 | chr14 | + | 1 | 1 | ATGTATTCCTCTCCAAAAA  | TACCTTTTTATTACATTCT   | 2772 | 924  | yes |
| PF14_0593 | PF14_0593e1s1 | chr14 | - | 1 | 1 | ATGAATAAACTATTTTTTTT | ATGATCATTAATAAATGAAT  | 2067 | 689  | yes |
| PF14_0626 | PF14_0626e4s2 | chr14 | + | 4 | 2 | AGTACAACAAAAGAATCATT | TATTCTTTTATATTTATAAG  | 2913 | 971  | yes |
| PF14_0631 | PF14_0631e1s2 | chr14 | - | 1 | 2 | TCTGAAAGTCAAAAATTCGG | CAGAACATTCGTCTTATCA   | 2352 | 784  | yes |
| PF14_0631 | PF14_0631e1s3 | chr14 | - | 1 | 3 | AATAAGGTAATTCGTCAA   | GTTCAATTGAATATATAAAT  | 2352 | 784  | yes |
| PF14_0736 | PF14_0736e2s1 | chr14 | + | 2 | 1 | TATATATGTCGAATTATAAG | AGAATCTTTAATTGTATCAA  | 2793 | 930  | yes |
| PFA0170c  | PFA0170ce1s1  | chr1  | - | 1 | 1 | ATGCTTTTTAAAAATGAAGA | TATAGCATTACTACTTATAT  | 2460 | 820  | no  |
| PFA0410w  | PFA0410we1s1  | chr1  | + | 1 | 1 | ATGGAATCCTATATAAGGGA | ATTACTAATTTTTAAAAATAT | 2259 | 753  | no  |
| PFA0410w  | PFA0410we1s2  | chr1  | + | 1 | 2 | CAGATGATACAATTTTCTAT | ATTTTTATTCAATGCACAAG  | 2259 | 753  | no  |
| PFA0430c  | PFA0430ce1s1  | chr1  | - | 1 | 1 | ATGAAATTTTATAGTCCTTT | ATACATCATTTTTTAAACA   | 1629 | 543  | no  |
| PFA0555c  | PFA0555ce4s1  | chr1  | - | 4 | 1 | GGTAAAATCGTGCCGGTGA  | TCCACAAGTTAATCCTCTAT  | 447  | 149  | no  |
| PFB0115w  | PFB0115we1s2  | chr2  | + | 1 | 2 | GATACAGATGATTCAGACAA | TAATGCTTTGTTTGCAATTTG | 1815 | 604  | no  |
| PFB0150c  | PFB0150ce2s2  | chr2  | - | 2 | 2 | CTTTATAATAATTTATCTTC | ATTCCTTTTCATTATCTTTT  | 2520 | 840  | no  |
| PFB0150c  | PFB0150ce2s3  | chr2  | - | 2 | 3 | AAGAATAATGAAAAGAATAA | TTTCTGGGATTGTTTCAGTCC | 2517 | 838  | no  |
| PFB0260w  | PFB0260we2s1  | chr2  | + | 2 | 1 | GCCGTATCTATACAAGTTCC | CTGTCCAACACGAACAGACA  | 2685 | 895  | no  |
| PFB0265c  | PFB0265ce1s2  | chr2  | - | 1 | 2 | AATGATATTATAAGAGATAC | TTTTTTTTCTTGCTTGATT   | 2301 | 766  | no  |
| PFB0315w  | PFB0315we1s1  | chr2  | + | 1 | 1 | ATGGATAGTGATAAATATAA | ACCACACATTTTCTTTCTT   | 2598 | 866  | no  |
| PFB0335c  | PFB0335ce1s1  | chr2  | - | 1 | 1 | ATGTCTACAGAACAGCATAG | ACTCTTTGATTCTTCGTTAG  | 393  | 131  | no  |
| PFB0405w  | PFB0405we1s1  | chr2  | + | 1 | 1 | ATGAAGAAAATTATAACGCT | ATTCCTAGGAAATAGAATAC  | 2394 | 798  | no  |
| PFB0465c  | PFB0465ce2s1  | chr2  | - | 2 | 1 | ATTAGCGGTATCATATTCAT | AAATGCTAGTGCTAACATGA  | 942  | 313  | no  |
| PFB0540w  | PFB0540we1s2  | chr2  | + | 1 | 2 | GATGAACTGTCTTATAACCC | GTGCAGGTAATTTTTTCTT   | 2793 | 930  | no  |
| PFB0635w  | PFB0635we1s1  | chr2  | + | 1 | 1 | ATGAAAAAATGAGGACAC   | GAAGGCTTCGTATAGTCAG   | 1575 | 524  | no  |
| PFB0640c  | PFB0640ce1s2  | chr2  | - | 1 | 2 | ACAGAAAATGAAAAGATAAA | ACTTGATGGAGGGGGGGAAC  | 1995 | 665  | no  |
| PFB0645c  | PFB0645ce2s1  | chr2  | - | 2 | 1 | TGGCAGAGTTATCCATTTTT | CAAAATGGTAAAGGTCITTA  | 552  | 183  | no  |
| PFB0895c  | PFB0895ce1s1  | chr2  | - | 1 | 1 | ATGAGTTCGAAGGACAAAAA | TTTTGCTTTTTTTCATAGATT | 2715 | 904  | no  |
| PFC0085c  | PFC0085ce2s1  | chr3  | - | 2 | 1 | AAATCATATTATGTATATAA | ATTTTTTTTTGATTTTTTAT  | 771  | 256  | no  |
| PFC0120w  | PFC0120we1s1  | chr3  | + | 1 | 1 | ATGGTTTCATTTTTTAAAC  | GGCTATTAATGAGGACCTA   | 858  | 286  | no  |
| PFC0150w  | PFC0150we2s2  | chr3  | + | 2 | 2 | ATGATAGAAAAAGTACGAGA | ACTTTCGGTATTTCCAAAAG  | 1641 | 547  | no  |
| PFC0170c  | PFC0170ce1s1  | chr3  | - | 1 | 1 | ATGTTTGTAAGAATGTACT  | TTCCAATAGTGGTCTAGGG   | 1347 | 448  | no  |
| PFC0180c  | PFC0180ce4s1  | chr3  | - | 4 | 1 | AAGTATATCCCAAGGATGC  | TTTATCACAAAAATAGTTAC  | 2124 | 707  | no  |
| PFC0425w  | PFC0425we1s4  | chr3  | + | 1 | 4 | AAAACAAAGAAGGATTATAA | TTTATATTGATTATCAAATA  | 2775 | 925  | no  |
| PFC0430w  | PFC0430we1s1  | chr3  | + | 1 | 1 | ATGCAAAATAATAAAGAAT  | ATCCAATCTAAATAATCTA   | 1749 | 583  | no  |
| PFC0590c  | PFC0590ce2s1  | chr3  | - | 2 | 1 | AGGAAAAATGGACCCCTCCC | TTTTTTTTTTTTAATTGTA   | 2082 | 694  | no  |
| PFC0635c  | PFC0635ce1s1  | chr3  | - | 1 | 1 | ATGAAGTATTTAACATTTAA | TCTATGTATGTACTAAGAC   | 684  | 227  | no  |
| PFC0720w  | PFC0720we1s1  | chr3  | + | 1 | 1 | ATGAATAAGATGGCTAGCAC | CATGTTTGCCTGATATCCT   | 1386 | 461  | no  |
| PFC0760c  | PFC0760ce1s3  | chr3  | - | 1 | 3 | AGAAATGAAATTGACAAATT | TTCATCTGTTAAAAAATCTT  | 2589 | 863  | no  |
| PFC0875w  | PFC0875we1s1  | chr3  | + | 1 | 1 | ATGAAAGACTTTTTATCATA | ATATTTATCTACATTTTTAT  | 3033 | 1011 | no  |
| PFC1065w  | PFC1065we2s1  | chr3  | + | 2 | 1 | GAAGTGGATTATGTGATTAA | AACAAGTTGTCTTTCTGCTT  | 2658 | 885  | no  |

|            |                |      |   |   |   |                       |                       |      |     |    |
|------------|----------------|------|---|---|---|-----------------------|-----------------------|------|-----|----|
| PFC0710w   | PFC0710we3s1   | chr3 | + | 3 | 1 | AAAGAAGATAAACATTATGA  | AGGTGTCCATATGTTGAGAT  | 417  | 138 | no |
| PFD0225w   | PFD0225we1s3   | chr4 | + | 1 | 3 | GAAATGGACGCCGCAGAAAA  | AGTATGTATATTATTTTCGAT | 2529 | 843 | no |
| PFD0225w   | PFD0225we1s5   | chr4 | + | 1 | 5 | GACATACTAAATCTTGGAAG  | TTTTTTATTTATTATCCCTT  | 2517 | 838 | no |
| PFD0265w   | PFD0265we2s1   | chr4 | + | 2 | 1 | GGGAGTGACGTTTTAACAAA  | ACCAGAATTATAGTCCCTCTT | 2382 | 794 | no |
| PFD0295c   | PFD0295ce4s1   | chr4 | - | 4 | 1 | GGTTACTTAAATATCCAAGT  | TGCGCAGAAAAAAGATTAA   | 1536 | 511 | no |
| PFD0445c   | PFD0445ce1s1   | chr4 | - | 1 | 1 | ATGGTCATCATATATATTTA  | TATTATATATATTTTGGAAA  | 2607 | 869 | no |
| PFD0995c   | PFD0995ce1s2   | chr4 | - | 1 | 2 | GAAGGTGAAGATGGTGAAGA  | CTTTAGTAGAAAAGTAACTCA | 2601 | 867 | no |
| PFD1060w   | PFD1060we1s3   | chr4 | + | 1 | 3 | TCTTTTTATATATTTGATCA  | CTCCTCCACGTTAATCTTAA  | 2907 | 968 | no |
| PFD0105c   | PFD0105ce1s1   | chr4 | - | 1 | 1 | ATGCATTTTGTAGTTGAATT  | TTTGTTAAATAATATAAAAA  | 2370 | 790 | no |
| PFE0055c   | PFE0055ce3s1   | chr5 | - | 3 | 1 | GATTACTATGCTGTATTAGG  | ATTTGATCTGCTTGATCTAG  | 402  | 134 | no |
| PFE0055c   | PFE0055ce4s1   | chr5 | - | 4 | 1 | AATATTTTTTCTCGATCATT  | CGTATTTTCCAAGGTTTCCT  | 567  | 189 | no |
| PFE0090w   | PFE0090we1s1   | chr5 | + | 1 | 1 | ATGCCAAATGTATATTTACC  | ACTTGAAAAAAGGCTTCTTT  | 1644 | 548 | no |
| PFE0270c   | PFE0270ce1s1   | chr5 | - | 1 | 1 | ATGGCATCATCTAACAAAA   | ATTATTAACATTTGTTCATAT | 1647 | 549 | no |
| PFE0335w   | PFE0335we1s1   | chr5 | + | 1 | 1 | ATGTCTAGCAGACTACTGAA  | TACCTTTTTGTCTTTGTACA  | 2451 | 817 | no |
| PFE0380c   | PFE0380ce1s1   | chr5 | - | 1 | 1 | ATGAGTACGATAATTATAAG  | TATCTTTACTGATGTTAACA  | 1596 | 531 | no |
| PFE0465c   | PFE0465ce1s3   | chr5 | - | 1 | 3 | ATGTCGGGAAGAGAAGGTTT  | ACCTGTATGGGTTCATGAAAT | 2874 | 958 | no |
| PFE0655w   | PFE0655we2s3   | chr5 | + | 2 | 3 | ACATCCACTATAATAAATGA  | TCTTAACAAGTCATCAAATA  | 2367 | 789 | no |
| PFE0780w   | PFE0780we6s1   | chr5 | + | 6 | 1 | CAACATACAAAAAGAATTT   | ATTTGAGTTCAATATTTGAT  | 1521 | 507 | no |
| PFE0935c   | PFE0935ce1s1   | chr5 | - | 1 | 1 | ATGTATATTTGTTTGATATA  | CCCGTGGTAGTAATACAAC   | 2331 | 777 | no |
| PFE1010w   | PFE1010we1s1   | chr5 | + | 1 | 1 | ATGAGTTTATTAACCAATTA  | CAAAGTGTTACTTATATTTAA | 1536 | 512 | no |
| PFE1025c   | PFE1025ce1s1   | chr5 | - | 1 | 1 | ATGAAGGAAAAATTATATGAT | ATATTGTTTTGCCCATCCTA  | 906  | 301 | no |
| PFE1120w   | PFE1120we3s1   | chr5 | + | 3 | 1 | TACGAAATGTTTCTCACAGC  | TAATTGTTCAATACATACTT  | 2802 | 934 | no |
| PFE1120w   | PFE1120we3s2   | chr5 | + | 3 | 2 | TTAAGTATGGGTAGTGCCAG  | CTTTTTCATATTGCATTTCCG | 2802 | 934 | no |
| PFE1120w   | PFE1120we3s3   | chr5 | + | 3 | 3 | TTAACCGATACAGTTAGTAA  | TATTCCTATAAAATGTATTA  | 2802 | 934 | no |
| PFE1120w   | PFE1120we3s5   | chr5 | + | 3 | 5 | TCAATAAAAAATGTCATCAAC | AATACTATTTGTTTCTATTT  | 2802 | 934 | no |
| PFE1120w   | PFE1120we3s6   | chr5 | + | 3 | 6 | AATCATTTTGTGATTTTAA   | TTTATTCCTATTCACGTATT  | 2802 | 934 | no |
| PFE1120w   | PFE1120we3s7   | chr5 | + | 3 | 7 | ATTATTAGTAGCAACCAAAA  | ATAGTGCCTCAATATTCTTA  | 2793 | 931 | no |
| PFE1120w   | PFE1120we4s2   | chr5 | + | 4 | 2 | CATGCTAATCTTCTAAATA   | ATAAATCATTTTTACTGAGT  | 2667 | 889 | no |
| PFE1120w   | PFE1120we4s3   | chr5 | + | 4 | 3 | ACATACTTAAATAGATATAA  | AACCTTTTTTTTTCTACTT   | 2661 | 886 | no |
| PFE1320w   | PFE1320we1s1   | chr5 | + | 1 | 1 | ATGTTTTAAAAGTAACAAGAT | ATCATTGTCTCCACATTTAT  | 2106 | 702 | no |
| PFE1355c   | PFE1355ce2s1   | chr5 | - | 2 | 1 | TGGCAACTGACGAATGTCCC  | TTCTTAATATCCATATTCA   | 1719 | 572 | no |
| MAL6P1.131 | MAL6P1.131e1s1 | chr6 | + | 1 | 1 | ATGAGTGAGAATAGTGATGA  | TGAATTCTTTCATCCATTT   | 2853 | 951 | no |
| MAL6P1.131 | MAL6P1.131e1s3 | chr6 | + | 1 | 3 | AAAAAATATGGGAAAAAAA   | ATGACAACACTATTTTGGTAT | 2853 | 951 | no |
| MAL6P1.131 | MAL6P1.131e1s4 | chr6 | + | 1 | 4 | AAAAACATTTCGAATGAAGA  | ATTATTATTATTATTATTAT  | 2853 | 951 | no |
| MAL6P1.131 | MAL6P1.131e1s5 | chr6 | + | 1 | 5 | AATATTTTAACTTTAATGG   | TCCTGTGATTTTTTCATCAT  | 2853 | 951 | no |
| MAL6P1.146 | MAL6P1.146e1s2 | chr6 | + | 1 | 2 | TCGATTATAAATCTATTAA   | ATTATGTACAACACGATACA  | 2346 | 782 | no |
| MAL6P1.146 | MAL6P1.146e1s3 | chr6 | + | 1 | 3 | GTTAGTGATGGAGATTCTTT  | ATTATCTTTCTAAGAACCCT  | 2346 | 782 | no |
| MAL6P1.201 | MAL6P1.201e1s1 | chr6 | + | 1 | 1 | ATGGCGAGACGTATGAACTT  | ATTATATGTTTGGAAATTAT  | 2202 | 734 | no |
| MAL6P1.201 | MAL6P1.201e1s2 | chr6 | + | 1 | 2 | TTTAAAAAAGATGTTCTAAT  | TCCTTCAGTGTTGTATATAT  | 2196 | 731 | no |

|            |                |      |   |    |   |                       |                       |      |     |    |
|------------|----------------|------|---|----|---|-----------------------|-----------------------|------|-----|----|
| MAL6P1.237 | MAL6P1.237e6s1 | chr6 | - | 6  | 1 | ATTGATGATGAAGGTATAGA  | AAATAAAGAAAGGTTTCGTAT | 1938 | 646 | no |
| MAL6P1.252 | MAL6P1.252e1s1 | chr6 | - | 1  | 1 | ATGGGTCCCAGCCTAGGAC   | ATCTTCTAATTCATGTTCTA  | 2085 | 695 | no |
| MAL6P1.252 | MAL6P1.252e1s2 | chr6 | - | 1  | 2 | ACAGAACATTCACAGGATGC  | TTTTAACGCTTAATCACGT   | 2085 | 695 | no |
| MAL6P1.252 | MAL6P1.252e2s1 | chr6 | - | 2  | 1 | AAAAAAACCAATCTACTAT   | AATAGGTTTAGAATTCATAT  | 1044 | 347 | no |
| MAL7P1.102 | MAL7P1.102e1s1 | chr7 | - | 1  | 1 | ATGAGTGTATTAATATAT    | TACACCACTCATATGATCTA  | 2628 | 876 | no |
| MAL7P1.102 | MAL7P1.102e1s2 | chr7 | - | 1  | 2 | GATAATTTGAGTGGTGTAGA  | TTTTTTTTTATCTTCTGAAT  | 2622 | 873 | no |
| MAL7P1.126 | MAL7P1.126e1s2 | chr7 | - | 1  | 2 | TATAATATAAATGAATTTAT  | TATTTTAAAGTTTTGGATCTC | 1716 | 572 | no |
| MAL7P1.134 | MAL7P1.134e2s2 | chr7 | - | 2  | 2 | CGAAATAATAACTATGATCA  | GAGAGAGATGACAATTTTTG  | 2400 | 800 | no |
| MAL7P1.134 | MAL7P1.134e2s3 | chr7 | - | 2  | 3 | CTATCACTTTTAAGAAATAA  | CTGGTTATAGTGAGGCTTGT  | 2397 | 798 | no |
| MAL7P1.138 | MAL7P1.138e1s1 | chr7 | + | 1  | 1 | ATGGGTGTTTTAAATTTAAA  | ACAATCCACCAGAGATAAAA  | 2283 | 761 | no |
| MAL7P1.14  | MAL7P1.14e1s1  | chr7 | - | 1  | 1 | ATGTTGGATAATTTTATTCA  | TGTACATGGATCGGGTAAAG  | 750  | 249 | no |
| MAL7P1.146 | MAL7P1.146e5s2 | chr7 | - | 5  | 2 | AATTTTATGAATAACAAGAA  | ATTATTCTTTATATCTGTAA  | 1563 | 521 | no |
| MAL7P1.23  | MAL7P1.23e1s2  | chr7 | + | 1  | 2 | GATCATAATGCTACTAATAA  | CCTCTTTTTTAAATTTGCT   | 1734 | 578 | no |
| MAL7P1.29  | MAL7P1.29e1s2  | chr7 | - | 1  | 2 | AATCATGTATTCCAGAAAAA  | ACCTATCTCCAAGTCGTTGA  | 1632 | 544 | no |
| MAL7P1.29  | MAL7P1.29e2s1  | chr7 | - | 2  | 1 | GGTCTGGCAGACACCGAATG  | GCCATTATTTCTAGTGTAT   | 2652 | 884 | no |
| MAL7P1.32  | MAL7P1.32e1s1  | chr7 | + | 1  | 1 | ATGACCACACCATTTTCTTT  | AAATTGCATATATTCAACAC  | 1191 | 396 | no |
| PF07_0004  | PF07_0004e2s1  | chr7 | - | 2  | 1 | TATGGAATAAAATATAATGA  | TCTTAATGGTTGTGCTACAT  | 2781 | 926 | no |
| PF07_0020  | PF07_0020e1s1  | chr7 | - | 1  | 1 | ATGAACGCTGAGAATTTGAA  | ATTATTATGGCCATAAATAT  | 1575 | 525 | no |
| PF07_0020  | PF07_0020e1s2  | chr7 | - | 1  | 2 | AATGGACAAGAACATATTTT  | ATCTCCATTCATTTCAATAT  | 1572 | 524 | no |
| PF07_0029  | PF07_0029e2s1  | chr7 | + | 2  | 1 | ATCACCGAATTACTCCGATT  | GTCAACTTCTCCATTTTAG   | 807  | 268 | no |
| PF07_0035  | PF07_0035e1s1  | chr7 | + | 1  | 1 | ATGTTTACTTTTCTTGTTAT  | TAAAGAAAATTCCTCTAAAG  | 1902 | 634 | no |
| PF07_0047  | PF07_0047e1s1  | chr7 | - | 1  | 1 | ATGAAAGTAAGAAAAATGCA  | AAAAATAATACATGGTGTTT  | 1875 | 625 | no |
| PF07_0087  | PF07_0087e1s1  | chr7 | + | 1  | 1 | ATGTCGAGACTTTTCTCTTT  | TTCAGTCACATAACATACTG  | 735  | 244 | no |
| PF07_0118  | PF07_0118e1s6  | chr7 | - | 1  | 6 | ATATTAAGAAATAAGCTCAT  | TAAATTTCTATGAAAAAAC   | 2811 | 936 | no |
| PF07_0128  | PF07_0128e1s1  | chr7 | + | 1  | 1 | ATGAAATGTAATATTAGTAT  | TAGGTTAGAACATTTTCCG   | 2163 | 721 | no |
| PF07_0128  | PF07_0128e1s2  | chr7 | + | 1  | 2 | TCTATAAAACCAGAAGTTTA  | ACTTGAAAAAGCCTCCTTTC  | 2157 | 719 | no |
| PF07_0129  | PF07_0129e1s1  | chr7 | + | 1  | 1 | ATGAATATTTTCATTTACGGT | TTTATTTAATTCTAATTCTT  | 2436 | 811 | no |
| MAL8P1.11  | MAL8P1.11e2s1  | chr8 | - | 2  | 1 | ATGAATAATGTCGCCTATGA  | ATCATCACTATAAGAATTAT  | 1806 | 602 | no |
| MAL8P1.132 | MAL8P1.132e3s1 | chr8 | + | 3  | 1 | CGATCAAGTAGGTCTCATGC  | CTGCATTTTCTCAACATTT   | 237  | 79  | no |
| MAL8P1.139 | MAL8P1.139e1s1 | chr8 | - | 1  | 1 | ATGGATCGTTCCTGTAAGGA  | CATATGTTTTGATTTGAACA  | 2748 | 916 | no |
| MAL8P1.139 | MAL8P1.139e2s2 | chr8 | - | 2  | 2 | AATAATAATAATGATGATGA  | TTTTGTTTCTTTTCGATGCAT | 2124 | 708 | no |
| MAL8P1.139 | MAL8P1.139e2s3 | chr8 | - | 2  | 3 | TTATACAAAAAGAACCCTGAC | CCTGTCTCTGCCAATATCA   | 2121 | 707 | no |
| MAL8P1.142 | MAL8P1.142e2s1 | chr8 | + | 2  | 1 | GCTAGCTATGGTAGTTATGC  | CCACATACATCCAGCAGGTG  | 714  | 237 | no |
| MAL8P1.23  | MAL8P1.23e1s3  | chr8 | + | 1  | 3 | TGCAAAAAATACAATGATTA  | ATTATTTATGGTCTCTTGGG  | 2913 | 971 | no |
| MAL8P1.23  | MAL8P1.23e1s4  | chr8 | + | 1  | 4 | CGTGAATATAATAAATCTT   | AACCACATTATTATATGTAG  | 2913 | 971 | no |
| MAL8P1.23  | MAL8P1.23e1s8  | chr8 | + | 1  | 8 | AATGTAAACAGTGAAATAA   | ATTCGGCACATTGTTTCATTA | 2913 | 971 | no |
| MAL8P1.60  | MAL8P1.60e15s1 | chr8 | + | 15 | 1 | GAAAATATTGAGAGCCTCTT  | ATCTTTTATTGAGAAAAATA  | 1110 | 370 | no |
| MAL8P1.60  | MAL8P1.60e4s1  | chr8 | + | 4  | 1 | GAAATTTTCGTAAAGACCAA  | ATTTATGTGCGATATCCTTTT | 306  | 102 | no |
| MAL8P1.69  | MAL8P1.69e3s1  | chr8 | - | 3  | 1 | TCCGTTGCTTATAAGAATGC  | TTTGTTACCTTCGGTCTGAT  | 600  | 199 | no |

|           |               |       |   |    |   |                       |                      |      |     |    |
|-----------|---------------|-------|---|----|---|-----------------------|----------------------|------|-----|----|
| PF08_0012 | PF08_0012e1s2 | chr8  | - | 1  | 2 | ATATTAATATTATTAATTT   | ATTATTGTTGTTATTATTAT | 2439 | 813 | no |
| PF08_0012 | PF08_0012e1s3 | chr8  | - | 1  | 3 | AATAATGATAATAATATTGA  | ACCTATGTAACCTTTACACT | 2430 | 809 | no |
| PF08_0018 | PF08_0018e1s1 | chr8  | - | 1  | 1 | ATGAACAAGATAAAAAATAAG | CTTTACATTTTTATTCTT   | 2127 | 709 | no |
| PF08_0018 | PF08_0018e1s2 | chr8  | - | 1  | 2 | GCATTTGAAGTAGTATGTAG  | TGAAAGGTCAAATGATTTTA | 2121 | 706 | no |
| PF08_0020 | PF08_0020e1s1 | chr8  | - | 1  | 1 | ATGGTGGATAAAATTAAGA   | ATTATTATAATATTTCTCGT | 2019 | 673 | no |
| PF08_0020 | PF08_0020e1s2 | chr8  | - | 1  | 2 | GTACATTTGGTTTTAAAGTG  | CATATTTGAAGTTTCATTTT | 2016 | 671 | no |
| PF08_0054 | PF08_0054e1s1 | chr8  | - | 1  | 1 | ATGGCTAGTGCAAAAGGTTTC | ATCAACTTCTTCAACTGTTG | 2034 | 677 | no |
| PF08_0089 | PF08_0089e1s2 | chr8  | - | 1  | 2 | GTCTATAAAAGTTTTACAAT  | ACTTACTATTATTCCATTAA | 2691 | 897 | no |
| PF08_0102 | PF08_0102e1s2 | chr8  | + | 1  | 2 | AAAGAAATGTTAAATTTATA  | AAAAAATAAGCATACAAAT  | 2001 | 666 | no |
| PF08_0135 | PF08_0135e1s1 | chr8  | + | 1  | 1 | ATGATAAAATCTTTTATAAA  | TTCATCCAGGTGCACCGTTT | 1650 | 549 | no |
| PF08_0140 | PF08_0140e1s1 | chr8  | - | 1  | 1 | ATGGTCCCCCTGTCCGTTTC  | ATTCAGGTTCAAATCTCCA  | 2583 | 861 | no |
| PFI0010c  | PFI0010ce2s1  | chr9  | - | 2  | 1 | ATATATAATCAAAGGAACCA  | TTCTTTCAATAATTTTATAT | 1077 | 358 | no |
| PFI0235w  | PFI0235we2s1  | chr9  | + | 2  | 1 | GACTTATTATTTTCGATTAG  | TAGTTTTTGTTTTTGGAGT  | 1443 | 480 | no |
| PFI0240c  | PFI0240ce1s1  | chr9  | - | 1  | 1 | ATGGCTAAATTGTCATTAAC  | ATTATCACCTTTTTTATTAT | 2487 | 829 | no |
| PFI0240c  | PFI0240ce1s2  | chr9  | - | 1  | 2 | TTCAGAAAAAGCGATATATC  | TCCTTCCTCGTCTTGATAAT | 2487 | 829 | no |
| PFI0260c  | PFI0260ce1s5  | chr9  | - | 1  | 5 | CCCAAAGGTGATTATAATGA  | CAAACCAATATCCACACTTT | 2670 | 890 | no |
| PFI0260c  | PFI0260ce1s5  | chr9  | - | 1  | 5 | CCCAAAGGTGATTATAATGA  | CAAACCAATATCCACACTTT | 2670 | 890 | no |
| PFI0345w  | PFI0345we1s2  | chr9  | + | 1  | 2 | TTCGAAAATATTGAAAATCA  | AAATGTGTGAGCATCGTCTA | 1725 | 574 | no |
| PFI0410c  | PFI0410ce18s1 | chr9  | - | 18 | 1 | GTGTTGAAGCACCATTTGTGG | CTTCTTATTTTGAGGTAAA  | 1425 | 474 | no |
| PFI0550w  | PFI0550we1s2  | chr9  | + | 1  | 2 | ATGCATTCATTCATATTTCC  | TCCCGGACAATAAAATGTGA | 2400 | 800 | no |
| PFI0580c  | PFI0580ce2s1  | chr9  | - | 2  | 1 | GATAATAACAGCTACTCATT  | TTGCACGTTTAACTCTACAA | 1176 | 391 | no |
| PFI0855w  | PFI0855we1s1  | chr9  | + | 1  | 1 | ATGGCAATTAATAATGAAGA  | AACCGTTTGTGCCATAACT  | 2046 | 681 | no |
| PFI0925w  | PFI0925we1s2  | chr9  | + | 1  | 2 | ATGAGTATGTGTTGTCAACA  | TGCACTCAGTTCGTACATTT | 1620 | 539 | no |
| PFI1000w  | PFI1000we1s2  | chr9  | + | 1  | 2 | TTTGTATCCTTCAATATATC  | AAGATTTAGAAGAAAATATT | 2805 | 934 | no |
| PFI1265w  | PFI1265we1s1  | chr9  | + | 1  | 1 | ATGAAGAATAATGAAGATAT  | ATCATTAGAATATGTTATGT | 2661 | 887 | no |
| PFI1425w  | PFI1425we2s1  | chr9  | + | 2  | 1 | CTGAATCTTATTGAAAACAT  | CTTCTTTTGTAAATAATATG | 1053 | 350 | no |
| PFI1620c  | PFI1620ce1s1  | chr9  | - | 1  | 1 | ATGAATAATATAAATTTTAG  | TTCTTCTGAATTCACTATCT | 2298 | 766 | no |
| PFI1730w  | PFI1730we2s1  | chr9  | + | 2  | 1 | GCTGTTGGGCATTTTATTAC  | ATTTAAAACCCAACGAAAT  | 606  | 202 | no |
| PF10_0013 | PF10_0013e2s1 | chr10 | + | 2  | 1 | AAATATATTCAAAATTTTGT  | AGTTATATATCTATCTTCGT | 624  | 207 | no |
| PF10_0041 | PF10_0041e1s2 | chr10 | - | 1  | 2 | AAAAATTATCATCGTCCAGA  | AAAATATTCTGAAAATTCAT | 1878 | 625 | no |
| PF10_0078 | PF10_0078e1s2 | chr10 | + | 1  | 2 | AACGAATCATATAATGAAGA  | AATTTTAAATTTTCTTTCTG | 2418 | 806 | no |
| PF10_0079 | PF10_0079e1s3 | chr10 | + | 1  | 3 | AACAACCATAATAATAACAG  | GAGGGTCATTTGACTATTGG | 2934 | 978 | no |
| PF10_0085 | PF10_0085e1s1 | chr10 | - | 1  | 1 | ATGCTCATTTTAGTTGAAAC  | CTTCTTTTTTGCTTCTTTA  | 1410 | 469 | no |
| PF10_0092 | PF10_0092e3s1 | chr10 | - | 3  | 1 | ATACGACTACGTAAAACCAA  | TATATAATTACCATCATTTT | 831  | 276 | no |
| PF10_0124 | PF10_0124e1s1 | chr10 | + | 1  | 1 | ATGGATATGAAAAATATATA  | AATATCTTCAAAAAAGTTAA | 2040 | 680 | no |
| PF10_0124 | PF10_0124e1s2 | chr10 | + | 1  | 2 | ATAAAAGTACATGGATATAA  | ACCCTTTAAAACCTGTTTTC | 2037 | 679 | no |
| PF10_0132 | PF10_0132e1s2 | chr10 | + | 1  | 2 | CAAATATTTAGTACAAGTAA  | ACAATAATTAATGTCATAAA | 1989 | 663 | no |
| PF10_0133 | PF10_0133e1s1 | chr10 | + | 1  | 1 | ATGAATACTTTGAAAGGTAA  | TTCTAGAGTAGCTTCAACTT | 2277 | 759 | no |
| PF10_0133 | PF10_0133e1s2 | chr10 | + | 1  | 2 | AATTTACTTAAATTGAAGGA  | CTCTTTTTGTGTTATAATAT | 2277 | 759 | no |



|           |               |       |   |   |   |                       |                       |      |     |    |
|-----------|---------------|-------|---|---|---|-----------------------|-----------------------|------|-----|----|
| PF10_0140 | PF10_0140e2s1 | chr10 | + | 2 | 1 | AATATATGTTTAAACGTTCC  | TTGAAATATAGATAATCTTT  | 276  | 91  | no |
| PF10_0143 | PF10_0143e1s1 | chr10 | - | 1 | 1 | ATGAATATAAATAAATATGA  | TGAACCTCCACCTGATCCTG  | 2616 | 872 | no |
| PF10_0143 | PF10_0143e1s2 | chr10 | - | 1 | 2 | AATTATATGAATAATACAAA  | CTGTTGTGGTAAATCGGATT  | 2616 | 872 | no |
| PF10_0153 | PF10_0153e2s1 | chr10 | - | 2 | 1 | GGTTGCAATAAGTTGGCCGA  | ATACATCCCCCCATATCAC   | 1602 | 533 | no |
| PF10_0161 | PF10_0161e1s1 | chr10 | - | 1 | 1 | ATGAAAAAATCGAGAATATT  | ATATGGGTGGTTCTTAAATG  | 687  | 229 | no |
| PF10_0211 | PF10_0211e1s2 | chr10 | - | 1 | 2 | ATATCTAAGCAGAATGAAGC  | AGGTACTTCTTTACATAATT  | 2121 | 707 | no |
| PF10_0211 | PF10_0211e1s3 | chr10 | - | 1 | 3 | AAATATAAATATCTAGAATC  | ATCATTCTGTTGATAATTAT  | 2112 | 704 | no |
| PF10_0214 | PF10_0214e2s1 | chr10 | + | 2 | 1 | ATGAACAAAAAACATAATAA  | GCCTGGTGGTCCATCTTTTA  | 1542 | 514 | no |
| PF10_0215 | PF10_0215e2s1 | chr10 | - | 2 | 1 | CAGTCGTCCAAATTAATTGG  | CTTTAACTATCAATTATCA   | 720  | 240 | no |
| PF10_0224 | PF10_0224e1s4 | chr10 | - | 1 | 4 | GGATATTTAACAAAAACAA   | TAATTCTACATGTGTAGTAT  | 2892 | 964 | no |
| PF10_0264 | PF10_0264e2s1 | chr10 | + | 2 | 1 | GTGCATATAGGTACAAAAAA  | CCACTCTCAGCGGCTATTG   | 729  | 242 | no |
| PF10_0320 | PF10_0320e1s1 | chr10 | - | 1 | 1 | ATGGATGACTCTTTAAACAA  | ATATTTATTGGTGTGTGTAT  | 2601 | 867 | no |
| PF10_0322 | PF10_0322e1s2 | chr10 | - | 1 | 2 | GCGACGAATAAATGATAA    | CCAATGTTTGTGGTTGCC    | 2178 | 725 | no |
| PF10_0356 | PF10_0356e1s1 | chr10 | + | 1 | 1 | ATGAAACATATTTTGTACAT  | TTTTCTTTAGCAAGTCTCT   | 1698 | 566 | no |
| PF10_0369 | PF10_0369e2s1 | chr10 | + | 2 | 1 | TTAAAAGATAGCACAAATGG  | TCCTAACTGTGTGTATCCA   | 774  | 258 | no |
| PF10_0379 | PF10_0379e1s1 | chr10 | + | 1 | 1 | ATGAATAATTTAECTTTAGG  | TTGCACGTATAAATTTGAAA  | 1080 | 359 | no |
| PF10_0401 | PF10_0401e2s1 | chr10 | + | 2 | 1 | GCACATAATAAAAATAAATC  | TTTTTTTTTCTTCGATAAC   | 834  | 277 | no |
| PF11_0008 | PF11_0008e1s3 | chr11 | - | 1 | 3 | TCATGTGGTTATTTCTGTGG  | CTTGAGTAAAAAGTAAGTCA  | 2604 | 868 | no |
| PF11_0048 | PF11_0048e1s1 | chr11 | + | 1 | 1 | ATGGAAAATAGTGATTCCAA  | CGTTTCAGAAATTTGTAGTT  | 738  | 245 | no |
| PF11_0049 | PF11_0049e1s1 | chr11 | + | 1 | 1 | ATGAATAATAATTTAATAT   | ATTTTTTGACATAACAAAAAT | 2571 | 857 | no |
| PF11_0053 | PF11_0053e1s2 | chr11 | - | 1 | 2 | TCTGGGAAAATGTCTTTATT  | CCCCTTGATTTGGTCGTATT  | 1923 | 641 | no |
| PF11_0067 | PF11_0067e1s1 | chr11 | - | 1 | 1 | ATGTATAAAAATAAACAGTC  | ACTTAAGTAATAACTAACT   | 2277 | 758 | no |
| PF11_0069 | PF11_0069e1s1 | chr11 | + | 1 | 1 | ATGATCCTTAATATATATAT  | CGAATCTCCTTTTATAATTC  | 207  | 69  | no |
| PF11_0129 | PF11_0129e1s1 | chr11 | - | 1 | 1 | ATGAATTTGTTTAAAGGGTT  | TCTCTTTGCTTTTTTTGACT  | 2397 | 799 | no |
| PF11_0156 | PF11_0156e1s1 | chr11 | + | 1 | 1 | ATGTCCAAAGATAAGAGAAA  | ATTTTGGTCGATATATGATG  | 690  | 230 | no |
| PF11_0158 | PF11_0158e1s1 | chr11 | + | 1 | 1 | ATGACGACGCTTAGAAGAAA  | ACATGTATCATTTATATTTA  | 2520 | 840 | no |
| PF11_0158 | PF11_0158e1s2 | chr11 | + | 1 | 2 | TATCATTCCAATAATAAAAAT | TCTATCCATCTCATCCATAT  | 2520 | 840 | no |
| PF11_0161 | PF11_0161e1s1 | chr11 | - | 1 | 1 | ATGGATTACCACATGGATTA  | TTCAATTAATGGAATGAATG  | 1449 | 482 | no |
| PF11_0162 | PF11_0162e1s1 | chr11 | - | 1 | 1 | ATGGAATATCATATGGAATA  | TTCAAGTAATGGTACATAAG  | 1479 | 492 | no |
| PF11_0165 | PF11_0165e1s1 | chr11 | - | 1 | 1 | ATGGATTACAACATGGATTA  | TTCAATTAATGGAATGAATG  | 1455 | 484 | no |
| PF11_0175 | PF11_0175e4s1 | chr11 | - | 4 | 1 | CCATTGGATAATAAAAGCAA  | GGTCTTAGATAAGTTTATAA  | 2409 | 802 | no |
| PF11_0225 | PF11_0225e1s1 | chr11 | + | 1 | 1 | ATGATGGAAGAACTTTTTAA  | TATTTTATTGTTAAGTAATA  | 2448 | 815 | no |
| PF11_0226 | PF11_0226e1s3 | chr11 | - | 1 | 3 | TTTCTTTCTGATTACACTAC  | TATCTCTATTTTTGTCTTA   | 2055 | 684 | no |
| PF11_0240 | PF11_0240e2s2 | chr11 | + | 2 | 2 | AATAAAAATTTAGATAATGA  | AAAATTGCCTCTATTATAAT  | 2619 | 873 | no |
| PF11_0240 | PF11_0240e2s5 | chr11 | + | 2 | 5 | ATAAGCGAAGAAGAGGAAGA  | ATTTAGATCTATTGAACAAA  | 2610 | 870 | no |
| PF11_0245 | PF11_0245e1s1 | chr11 | + | 1 | 1 | ATGAATGAACCTTTTGTGTTT | ACCCAATGTTCTTGCCAACA  | 768  | 256 | no |
| PF11_0270 | PF11_0270e1s1 | chr11 | - | 1 | 1 | ATGAAAAAATAATTATGGT   | TACTAATTCCTTTTTTTT    | 1551 | 517 | no |
| PF11_0270 | PF11_0270e1s2 | chr11 | - | 1 | 2 | GATAGTTTACAAAGAGTATA  | AATGGTTTGGTTTGAGTTAA  | 1545 | 514 | no |
| PF11_0302 | PF11_0302e1s1 | chr11 | + | 1 | 1 | ATGATTTAAAATAATATTAGC | GCTCGATATTGGTGTGTTTT  | 1359 | 452 | no |

|           |               |       |   |   |   |                       |                       |      |     |    |
|-----------|---------------|-------|---|---|---|-----------------------|-----------------------|------|-----|----|
| PF11_0307 | PF11_0307e1s2 | chr11 | + | 1 | 2 | GTATTACCGTTCCAAGATAT  | GTGCGTATTTTTTTTTTAT   | 2034 | 677 | no |
| PF11_0341 | PF11_0341e1s2 | chr11 | + | 1 | 2 | ATTGTATTTTCGAAAATTCA  | CTCGTTATAATCAAACCTTC  | 1536 | 512 | no |
| PF11_0356 | PF11_0356e1s2 | chr11 | + | 1 | 2 | TATGCAAATTGTTTAAACATC | TATATTTAAAAGATCATATG  | 2571 | 856 | no |
| PF11_0358 | PF11_0358e2s1 | chr11 | - | 2 | 1 | GATAATAACGATTATAAGAA  | CACTACGGCATTTCGTACCAC | 1563 | 521 | no |
| PF11_0358 | PF11_0358e2s2 | chr11 | - | 2 | 2 | GATTATGAATTTTATGGAGT  | CTTCATGTCAAAAACATTTT  | 1557 | 518 | no |
| PF11_0374 | PF11_0374e2s1 | chr11 | + | 2 | 1 | GGCGGAGTATCACAGGAAAG  | ATTTTTTTTCTTTGAGATGT  | 1641 | 547 | no |
| PF11_0395 | PF11_0395e1s2 | chr11 | - | 1 | 2 | ACAGAATTAATTTCTGACGA  | TTTACTTTTTAATTCATTAT  | 2580 | 860 | no |
| PF11_0395 | PF11_0395e1s3 | chr11 | - | 1 | 3 | AATATACAGAAATATAAACA  | CCTGTTGTTGTCGTTCTTAA  | 2580 | 860 | no |
| PF11_0395 | PF11_0395e1s4 | chr11 | - | 1 | 4 | GTTGAAAATAATTTGATTAA  | TGTATTAATGTATTCATAT   | 2580 | 860 | no |
| PF11_0395 | PF11_0395e1s5 | chr11 | - | 1 | 5 | GATTCTAATATAAATGAAGG  | CAAATTCGACTGGCGATCGT  | 2577 | 858 | no |
| PF11_0407 | PF11_0407e1s1 | chr11 | - | 1 | 1 | ATGCCTTTTTATGATAATTT  | TTCATTTCTTTGTCGCTCA   | 1518 | 505 | no |
| PF11_0422 | PF11_0422e1s2 | chr11 | + | 1 | 2 | ATGAAGAACGATGAAAGAAA  | AGATTGACTTGGAATAAAT   | 2601 | 867 | no |
| PF11_0512 | PF11_0512e2s1 | chr11 | - | 2 | 1 | TATAATTTTACATATAGTGG  | ATGTTCCCTTTCTCCATTT   | 798  | 266 | no |
| PFL0015c  | PFL0015ce2s1  | chr12 | - | 2 | 1 | GTGTATAGTAAAAACAAACC  | TTGATTTAATAATTTTGTGT  | 969  | 322 | no |
| PFL0085c  | PFL0085ce2s1  | chr12 | - | 2 | 1 | TTTATTTCTGATAAGCCTTT  | TACTATATTTTTATCTCCAT  | 567  | 188 | no |
| PFL0130c  | PFL0130ce1s1  | chr12 | - | 1 | 1 | ATGGCAAACAAGATTAAC    | AGCAAACGTTTTAGGTTTCA  | 1875 | 625 | no |
| PFL0185c  | PFL0185ce3s1  | chr12 | - | 3 | 1 | TACGATGATAAATGACCGA   | AGAAGTAAGAGGATCCTCAT  | 963  | 320 | no |
| PFL0305c  | PFL0305ce2s1  | chr12 | - | 2 | 1 | GTTATGAATTCAGATATGAA  | TCCAACATCATCTATCAAAT  | 240  | 80  | no |
| PFL0405w  | PFL0405we3s1  | chr12 | + | 3 | 1 | GGAGATATTAATTATGATAA  | ATATTCCTTAGTATATATTT  | 1803 | 601 | no |
| PFL0445w  | PFL0445we1s1  | chr12 | + | 1 | 1 | ATGGAATTCCTGAGCAATAT  | TCTTACAATTACATTCTCGT  | 2193 | 731 | no |
| PFL0545w  | PFL0545we3s1  | chr12 | + | 3 | 1 | GTTGGAAATGATGAGGTTTA  | TATGTTTCGTCCTGGAGGAA  | 2631 | 877 | no |
| PFL0555c  | PFL0555ce1s1  | chr12 | - | 1 | 1 | ATGAAATGTTTTATGAACA   | TTGAACTATCCATTTCTGTT  | 2778 | 926 | no |
| PFL0625c  | PFL0625ce1s1  | chr12 | - | 1 | 1 | ATGCAAACGTTTCAGAAACC  | CTTAATAGTTTTTCATTTT   | 2097 | 699 | no |
| PFL0635c  | PFL0635ce1s2  | chr12 | - | 1 | 2 | TTTAATGTTATAAAAAATCC  | TATTTTAGCGTCATAACCTT  | 1659 | 552 | no |
| PFL0730w  | PFL0730we1s1  | chr12 | + | 1 | 1 | ATGAACATAAGCAACAGTAG  | CCTTTTCATTGGGAAACATG  | 2766 | 922 | no |
| PFL1010c  | PFL1010ce1s2  | chr12 | - | 1 | 2 | AGAATGAAACAAATAAGAA   | ATCATCAAGTTTAAACAGATT | 2367 | 789 | no |
| PFL1010c  | PFL1010ce1s3  | chr12 | - | 1 | 3 | ATGAATATGTTTAAAAATAA  | ACTTGTAGACATAGTCTTT   | 2364 | 787 | no |
| PFL1135c  | PFL1135ce1s1  | chr12 | - | 1 | 1 | ATGGAAGAAATTGAAAATGC  | CACTTCTATATGTTACGCCT  | 537  | 179 | no |
| PFL1135c  | PFL1135ce2s1  | chr12 | - | 2 | 1 | GTGTTTACCAAAGTTCAGAT  | ATGTTGAAAATTATATACAA  | 2103 | 701 | no |
| PFL1255c  | PFL1255ce1s1  | chr12 | - | 1 | 1 | ATGAAAGTTCCTAATTTCCC  | CTTGCAGAAATTAAGTGAG   | 2439 | 813 | no |
| PFL1300c  | PFL1300ce1s1  | chr12 | - | 1 | 1 | ATGTTTATAATAAATGCAT   | ATTTTCCGTAATATAATTTT  | 1488 | 495 | no |
| PFL1395c  | PFL1395ce1s1  | chr12 | - | 1 | 1 | ATGTATATTGAGAAGTTAAA  | CTTATGAGATACCTCGTACT  | 2451 | 817 | no |
| PFL1395c  | PFL1395ce1s4  | chr12 | - | 1 | 4 | TTAAGACCATCATGTTGTAA  | TAAACATAACTCGTGAAAT   | 2439 | 812 | no |
| PFL1410c  | PFL1410ce1s1  | chr12 | - | 1 | 1 | ATGATGAGACGGAGAAGCGT  | TTTTTTTTTACAATCGCTTT  | 2148 | 716 | no |
| PFL1410c  | PFL1410ce1s3  | chr12 | - | 1 | 3 | AAAATTGGAAGACCTCTAAT  | ATTTAATTGTTTTCTTGAA   | 2139 | 712 | no |
| PFL1545c  | PFL1545ce1s1  | chr12 | - | 1 | 1 | ATGAGAATGAAAAGAATTCA  | ATGTACCACTTTTATTGCGC  | 1023 | 341 | no |
| PFL1605w  | PFL1605we1s2  | chr12 | + | 1 | 2 | GAGGATAAGCATTATGAATC  | GTCGTCAAATGCTAAAGGTC  | 2145 | 714 | no |
| PFL1620w  | PFL1620we1s3  | chr12 | + | 1 | 3 | GATGAAAATAATAATAGAAA  | ATAAGGATAATTGTTATCAT  | 2733 | 911 | no |
| PFL1620w  | PFL1620we1s4  | chr12 | + | 1 | 4 | TGCAACAAAGCAGATAATTT  | TCTCCAGTATTTTATGTTTA  | 2733 | 911 | no |

|             |                 |       |   |   |   |                       |                       |      |      |    |
|-------------|-----------------|-------|---|---|---|-----------------------|-----------------------|------|------|----|
| PFL1680w    | PFL1680we1s2    | chr12 | + | 1 | 2 | GCATCATCTAATAGTTCACA  | CCTCAAATAAAGACAGAAT   | 1779 | 593  | no |
| PFL1880w    | PFL1880we1s1    | chr12 | + | 1 | 1 | ATGAAAATGGATATTATAA   | CTTATTTCTTGATTTATAAA  | 2379 | 792  | no |
| PFL2190c    | PFL2190ce1s2    | chr12 | - | 1 | 2 | AATATGAAATTAATATGGA   | TGTGTTATATTGAGAAGTGT  | 2433 | 810  | no |
| PFL2335w    | PFL2335we1s2    | chr12 | + | 1 | 2 | ATGTTAGGTGATGAAAAATT  | TTCAGGAAGCTTATCCTGTA  | 3009 | 1002 | no |
| PFL2430c    | PFL2430ce1s1    | chr12 | - | 1 | 1 | ATGGATTACATGTAAAAAA   | GTCAAAACCAAGTCCATAT   | 2040 | 679  | no |
| PFL2440w    | PFL2440we2s2    | chr12 | + | 2 | 2 | AAAACGGTGGATGTTATAAG  | TGAGTGAATAAGAATGCCA   | 2403 | 800  | no |
| MAL13P1.107 | MAL13P1.107e1s1 | chr13 | - | 1 | 1 | ATGAATATTCTCTTATCAT   | ATTTGTTTTATATTTTCCT   | 2259 | 753  | no |
| MAL13P1.107 | MAL13P1.107e1s2 | chr13 | - | 1 | 2 | GAAGAAAATATTAACACAAA  | TTCGTTTATGTAAAATACAT  | 2256 | 751  | no |
| MAL13P1.114 | MAL13P1.114e3s1 | chr13 | - | 3 | 1 | CCCAAAAGATTGGAAAATCG  | CATATAATTTTCTGATTTAT  | 2919 | 973  | no |
| MAL13P1.123 | MAL13P1.123e1s1 | chr13 | + | 1 | 1 | ATGGAAAATCGCAAAATTTT  | ATTAGGGATATTAGAAGATC  | 2529 | 843  | no |
| MAL13P1.133 | MAL13P1.133e3s1 | chr13 | - | 3 | 1 | CTATACAACACATAATCCT   | ATTGGGTGTATTAATAATT   | 591  | 196  | no |
| MAL13P1.140 | MAL13P1.140e1s3 | chr13 | - | 1 | 3 | ACAAACCCTTATGCTATTA   | CTCATCGGAGAGTTTTCTA   | 2778 | 926  | no |
| MAL13P1.148 | MAL13P1.148e3s2 | chr13 | + | 3 | 2 | GTAAGTCGTGCAGGTTACCC  | ACATTTATGTGTTATAATAT  | 2109 | 703  | no |
| MAL13P1.178 | MAL13P1.178e2s1 | chr13 | + | 2 | 1 | GGATCTCTTACAGGGAAAGT  | AACATTTTCTCAATGGAAT   | 1053 | 350  | no |
| MAL13P1.19  | MAL13P1.19e1s1  | chr13 | - | 1 | 1 | ATGAATGAAAATAATAGCAA  | ATGAATAGAATGATTTTGTT  | 2832 | 944  | no |
| MAL13P1.201 | MAL13P1.201e1s1 | chr13 | + | 1 | 1 | ATGCATTTCTGTAGCAAGAG  | AGCATATTTGCACCTATATA  | 1728 | 576  | no |
| MAL13P1.218 | MAL13P1.218e2s1 | chr13 | - | 2 | 1 | ATGATGCAAAAAGTTTTTGA  | TGAATTAATTCCTTTGCA    | 1785 | 594  | no |
| MAL13P1.22  | MAL13P1.22e2s1  | chr13 | - | 2 | 1 | TTAAAATGTTTCTCTTTCC   | TTCATTTTCAGTATCATCAT  | 2544 | 847  | no |
| MAL13P1.230 | MAL13P1.230e1s1 | chr13 | - | 1 | 1 | ATGAAGGACGAAATAGAAGA  | ATCGTTAATTTCTGGAAGAAA | 1938 | 646  | no |
| MAL13P1.234 | MAL13P1.234e1s1 | chr13 | + | 1 | 1 | ATGTTTCAATCACTAGTTGA  | TTCTCATCATCATCGTTAT   | 3039 | 1013 | no |
| MAL13P1.234 | MAL13P1.234e1s4 | chr13 | + | 1 | 4 | AACAATAAAAAGCAACCATAA | ATTGACATCCTCATTAGCAT  | 3039 | 1013 | no |
| MAL13P1.234 | MAL13P1.234e1s6 | chr13 | + | 1 | 6 | TCGTCTGTTATATATCCTAG  | AAGGGCAGAATTATTGGCGC  | 3027 | 1009 | no |
| MAL13P1.278 | MAL13P1.278e1s5 | chr13 | + | 1 | 5 | AGAAATAATGAAAAAATATC  | TGTTGTCTTATTTAAAATTG  | 2463 | 820  | no |
| MAL13P1.285 | MAL13P1.285e2s1 | chr13 | - | 2 | 1 | GGGCTTGATTTATTCTTTAC  | ATTTTGATCTGATTTTGTTG  | 2943 | 981  | no |
| MAL13P1.323 | MAL13P1.323e1s2 | chr13 | + | 1 | 2 | AAGGATTTATCAAATGTTAG  | ATTTTATCATCTCCTTTAT   | 2493 | 831  | no |
| MAL13P1.323 | MAL13P1.323e1s3 | chr13 | + | 1 | 3 | TTTATACCTAAAGAATATTA  | ATAACATATTATGAGGAAGT  | 2493 | 831  | no |
| MAL13P1.346 | MAL13P1.346e1s2 | chr13 | - | 1 | 2 | AATAATAATGTCAACATGTC  | TGATATATTTTCATTTAAAA  | 2577 | 858  | no |
| MAL13P1.39  | MAL13P1.39e4s1  | chr13 | - | 4 | 1 | ATACATACAGATTTGTTATT  | CTTCGTACTACTAAACCTAC  | 2142 | 714  | no |
| MAL13P1.56  | MAL13P1.56e1s1  | chr13 | + | 1 | 1 | ATGAAATTAACAAAAGGCTG  | TAAAAATTGAACACTTCTTA  | 1659 | 553  | no |
| MAL13P1.78  | MAL13P1.78e1s2  | chr13 | - | 1 | 2 | CAAAATATTAATGCATCTGA  | TAGTTGTGAATATATCAAAT  | 1647 | 548  | no |
| PF13_0012   | PF13_0012e1s1   | chr13 | - | 1 | 1 | ATGAAGGTCTCTAAATTAGT  | GTTCTCTTCTTGAGATAAAT  | 690  | 229  | no |
| PF13_0014   | PF13_0014e1s1   | chr13 | - | 1 | 1 | ATGGATGCTGTTCAAAAGAG  | TCTCTTTCCAATAATTTTAC  | 420  | 140  | no |
| PF13_0021   | PF13_0021e1s1   | chr13 | - | 1 | 1 | ATGAGCGAAAATAATTTAAG  | ATCTATTTCTATTTTTTTTT  | 636  | 211  | no |
| PF13_0040   | PF13_0040e2s1   | chr13 | - | 2 | 1 | AAGAACCCTGAGAGACATAA  | TATTCCTTCATCGTATATTT  | 1752 | 583  | no |
| PF13_0044   | PF13_0044e2s1   | chr13 | - | 2 | 1 | GATTTTAAAACAGTTGGGAG  | TCTTTTCAATTTTCTTTTA   | 2406 | 802  | no |
| PF13_0044   | PF13_0044e2s2   | chr13 | - | 2 | 2 | ATAACAGAAAATAGAACATT  | ATTATAATTAGAACAATTCA  | 2406 | 802  | no |
| PF13_0062   | PF13_0062e1s1   | chr13 | + | 1 | 1 | ATGGCATGTATAAGCGCTAT  | GGACATTCTGACCTGATAGT  | 1314 | 437  | no |
| PF13_0080   | PF13_0080e1s3   | chr13 | + | 1 | 3 | TACATTTTGGCGATTTCATA  | ATTTTTTATTTTGAACATGT  | 2553 | 850  | no |
| PF13_0121   | PF13_0121e3s1   | chr13 | + | 3 | 1 | GAAACCATTAAAGTACCTAG  | ACAATCAATTAACATTAGAT  | 1131 | 376  | no |

|           |                |       |   |    |   |                       |                      |      |      |    |
|-----------|----------------|-------|---|----|---|-----------------------|----------------------|------|------|----|
| PF13_0153 | PF13_0153e1s1  | chr13 | + | 1  | 1 | ATGGCTTCGGGAAAAGGTAA  | TGATATAAAATGTTCAAAT  | 1536 | 512  | no |
| PF13_0157 | PF13_0157e1s1  | chr13 | - | 1  | 1 | ATGATTTACAAATTTTACAA  | TACTTTCAATTCTATTTGTC | 1683 | 560  | no |
| PF13_0161 | PF13_0161e1s2  | chr13 | - | 1  | 2 | ATAAAAAAGATGATAATAC   | AATGCAATTACAATAATTCG | 2718 | 905  | no |
| PF13_0173 | PF13_0173e1s1  | chr13 | + | 1  | 1 | ATGAAAAAGAAAAAAGAG    | CCCTGACGATTCCAATTTTA | 1674 | 558  | no |
| PF13_0179 | PF13_0179e1s1  | chr13 | - | 1  | 1 | ATGTTAAGATTTGTCAATGA  | TATAGGTGTACCCCAATATC | 1938 | 646  | no |
| PF13_0182 | PF13_0182e1s1  | chr13 | + | 1  | 1 | ATGAATATTTTGTGCATCCA  | TGGATACACAACTTGACTAC | 2787 | 929  | no |
| PF13_0201 | PF13_0201e1s1  | chr13 | - | 1  | 1 | ATGAATCATCTTGGGAATGT  | ATTCCACTCGTTTTCTTCAG | 1725 | 574  | no |
| PF13_0214 | PF13_0214e2s1  | chr13 | + | 2  | 1 | AAATTACTTGCTCCCAAAAA  | TTTCATACCTTTCTGTGCGA | 1227 | 408  | no |
| PF13_0248 | PF13_0248e1s1  | chr13 | - | 1  | 1 | ATGTGTATGGGAAGAATGAT  | TATGCTAACATACATGTAAG | 1320 | 439  | no |
| PF13_0285 | PF13_0285e1s1  | chr13 | - | 1  | 1 | ATGACGAATTACTCTAAAAT  | AGAATTGGCGTCCAATTTAG | 2412 | 803  | no |
| PF13_0327 | PF13_0327e1s1  | chr13 | + | 1  | 1 | ATGTTTAAGTTTAATTCTAA  | CCATTGTCTTCCAATAACCT | 633  | 211  | no |
| PF13_0339 | PF13_0339e1s1  | chr13 | - | 1  | 1 | ATGAATGTAGAAGATAATTC  | GCCCTTAATATACATATCAT | 2751 | 917  | no |
| PF13_0350 | PF13_0350e1s1  | chr13 | - | 1  | 1 | ATGATTGATGTCATTAACAT  | ACTTAAGGCCTTAACAACCA | 1731 | 576  | no |
| PF13_0320 | PF13_0320e13s2 | chr13 | + | 13 | 2 | TCTAAAGATGGTGTCTTCTTA | CGCCTGTGGCTCGTTTTGTA | 2925 | 974  | no |
| PF13_0320 | PF13_0320e9s1  | chr13 | + | 9  | 1 | CAAATTTGTGAGGATGATGA  | CATTGATTCTACATTTGTCA | 1077 | 359  | no |
| PF14_0013 | PF14_0013e2s1  | chr14 | - | 2  | 1 | AATAACGGAGATCGAAATTC  | TTCATTAGAACTTTCTAACA | 1341 | 446  | no |
| PF14_0031 | PF14_0031e4s2  | chr14 | - | 4  | 2 | AAGTGTGATATTATTCGAGG  | CTTCTCTCTTCATTTTAC   | 2955 | 984  | no |
| PF14_0144 | PF14_0144e1s1  | chr14 | + | 1  | 1 | ATGATCACGAGTACATATCA  | CTTGTCTTTCTATTTCTGG  | 1563 | 520  | no |
| PF14_0145 | PF14_0145e1s2  | chr14 | - | 1  | 2 | GAGGAGATATCAGAAATATAT | ATAACACAAAGATTTATTTA | 2103 | 700  | no |
| PF14_0170 | PF14_0170e1s1  | chr14 | + | 1  | 1 | ATGAGGATGGATTACCATGA  | GCAAACTTTTTTTATTTT   | 2706 | 902  | no |
| PF14_0170 | PF14_0170e1s3  | chr14 | + | 1  | 3 | AATAATCTCATATGTAATTC  | GATGTTGCTGATTTTTTGA  | 2706 | 902  | no |
| PF14_0170 | PF14_0170e1s4  | chr14 | + | 1  | 4 | AGTATTGAAAACAGCAATGG  | ATTTATATCTTCTTCTTTAT | 2706 | 902  | no |
| PF14_0188 | PF14_0188e1s2  | chr14 | - | 1  | 2 | ATAAGTTTATTAATAAATA   | ATCTTTTAAAATATGAGCAT | 2118 | 706  | no |
| PF14_0196 | PF14_0196e1s1  | chr14 | - | 1  | 1 | ATGCAGGAATTTGTTATGAA  | ATTCATAAAAAGTAATAAGA | 1899 | 633  | no |
| PF14_0228 | PF14_0228e1s1  | chr14 | - | 1  | 1 | ATGAATAAACAAATCGGATTC | AACCTCAATTGAAATAATAT | 2367 | 789  | no |
| PF14_0249 | PF14_0249e1s1  | chr14 | + | 1  | 1 | ATGGTTTTAGGTTTTAAATT  | TAAATTAACAGGTATATATA | 1785 | 595  | no |
| PF14_0315 | PF14_0315e2s3  | chr14 | - | 2  | 3 | AGAAATAAAAATACATGTGA  | ATTTTTTTTATCTTCCAAAT | 3006 | 1002 | no |
| PF14_0316 | PF14_0316e1s1  | chr14 | - | 1  | 1 | ATGGCGAAAAATAAAACTAT  | GGAACCTAATATAAAATTTT | 2124 | 708  | no |
| PF14_0334 | PF14_0334e1s1  | chr14 | - | 1  | 1 | ATGGGGAAAGAAAATATAGA  | TATAATATGTGGAAAATCAG | 2373 | 791  | no |
| PF14_0338 | PF14_0338e1s1  | chr14 | - | 1  | 1 | ATGAATAAAATGAAGAAAAC  | ACTATAATTATTACTTGGAT | 891  | 297  | no |
| PF14_0338 | PF14_0338e9s1  | chr14 | - | 9  | 1 | AGAAAAGAAGAGGCTAATCC  | TGTGGGGCTCATACCATGAG | 966  | 321  | no |
| PF14_0370 | PF14_0370e1s1  | chr14 | + | 1  | 1 | ATGAAGGAAAGAATAAATGA  | TTTATTTGTCTCATTCTAG  | 2124 | 708  | no |
| PF14_0370 | PF14_0370e2s1  | chr14 | + | 2  | 1 | GGTAGTGGAAAAACAGTTAT  | ATTTTTACGTTTTCTTGAA  | 1545 | 515  | no |
| PF14_0370 | PF14_0370e2s2  | chr14 | + | 2  | 2 | CAATTTGATGATAAAGCTTT  | CCATTGTACATTCTGAGATG | 1542 | 514  | no |
| PF14_0384 | PF14_0384e1s1  | chr14 | + | 1  | 1 | ATGAAAGAATCAAGTTCTAA  | TAATAATGTAGATAAACAG  | 1662 | 553  | no |
| PF14_0392 | PF14_0392e5s1  | chr14 | + | 5  | 1 | AAACTCTATTTGGACGAAGT  | AAGCTCACTATTATTAGTCC | 2076 | 692  | no |
| PF14_0401 | PF14_0401e2s1  | chr14 | - | 2  | 1 | AAAATAACACTGCAATATAA  | TGATATTGTTCCCTGATTTA | 1080 | 359  | no |
| PF14_0407 | PF14_0407e1s2  | chr14 | + | 1  | 2 | TTGAAAAAATAAACATTA    | ATTTCTTTCTTAGACTTTC  | 2580 | 860  | no |
| PF14_0412 | PF14_0412e2s1  | chr14 | - | 2  | 1 | GCCGATATAAATAACATAAG  | AAAAGCCACAACGCCCAGA  | 2337 | 778  | no |
